# Supplementary material
Source: publisher site journal article supplement (https://www.dovepress.com/article/454903)
Supplement: Supplementary file 1 [file get_supplementary_file.php]

|  | **All participants** | | **Participants at both timepoints** | |
| --- | --- | --- | --- | --- |
|  | **n = 93** | **n = 109** | **n = 34** | |
|  | *n (%)* | | *n (%)* | |
| **Gender** | 2020 | 2022 | 2020 | 2022 |
| Woman | 45 (48) | 66 (61) | 16 (47) | 16 (47) |
| Men | 43 (46) | 39 (36) | 16 (47) | 14 (41) |
| (non)-binary | 0 (0) | 1 (1) | 0 (0) | 1 (3) |
| Rather not say | 3 (3) | 3 (3) | 1 (3) | 2 (6) |
| Unknown | 2 (2) | 0 (0) | 1 (3) | 1 (3) |
| **Numbers of years in current job** | |  |  |  |
| < 1 | 8 (9) | 8 (7) | 0 (0) | 0 (0) |
| 1 to 5 | 24 (26) | 22 (20) | 4 (12) | 2 (6) |
| 6 to 10 | 23 (25) | 28 (26) | 9 (26) | 9 (26) |
| 11 to 15 | 12 (13) | 16 (15) | 5 (15) | 9 (26) |
| 16 to 20 | 15 (16) | 14 (13) | 8 (24) | 7 (21) |
| ≥ 21 | 8 (9) | 17 (16) | 5 (15) | 6 (18) |
| Rather not say | 1 (1) | 3 (3) | 1 (3) | 0 (0) |
| Unknown | 2 (2) | 1 (1) | 2 (6) | 1 (3) |
| **Numbers of years worked in hospital** | |  |  |  |
| < 1 | 3 (3) | 13 (12) | 0 (0) | 0 (0) |
| 1 to 5 | 17 (18) | 27 (25) | 6 (18) | 3 (9) |
| 6 to 10 | 25 (27) | 24 (22) | 9 (26) | 11 (32) |
| 11 to 15 | 10 (11) | 16 (15) | 7 (21) | 7 (21) |
| 16 to 20 | 21 (23) | 13 (12) | 6 (18) | 6 (18) |
| ≥ 21 | 12 (13) | 12 (11) | 4 (12) | 6 (18) |
| Rather not say | 1 (1) | 3 (3) | 1 (3) | 0 (0) |
| Unknown | 3 (3) | 1 (1) | 1 (3) | 1 (3) |
| **Function** |  |  |  |  |
| Medical specialist | 73 (78) | 85 (78) | 29 (85) | 32 (94) |
| Resident | 8 (9) | 16 (15) | 0 (0) | 1 (3) |
| Intern | 5 (5) | 7 (6) | 0 (0) | 0 (0) |
| Rather not say | 3 (3) | 0 (0) | 2 (6) | 0 (0) |
| Unknown | 4 (4) | 1 (1) | 3 (9) | 1 (3) |
| **Organization principle** |  |  |  |  |
| Patient-oriented | 52 (56) | 57 (52) | 21 (62) | 21 (62) |
| Process-oriented | 41 (44) | 47 (43) | 13 (38) | 13 (38) |
| Unknown | 0 (0) | 5 (5) | 0 | 0 |

**Table S1.** Characteristics of the participating physicians in 2020 and 2022


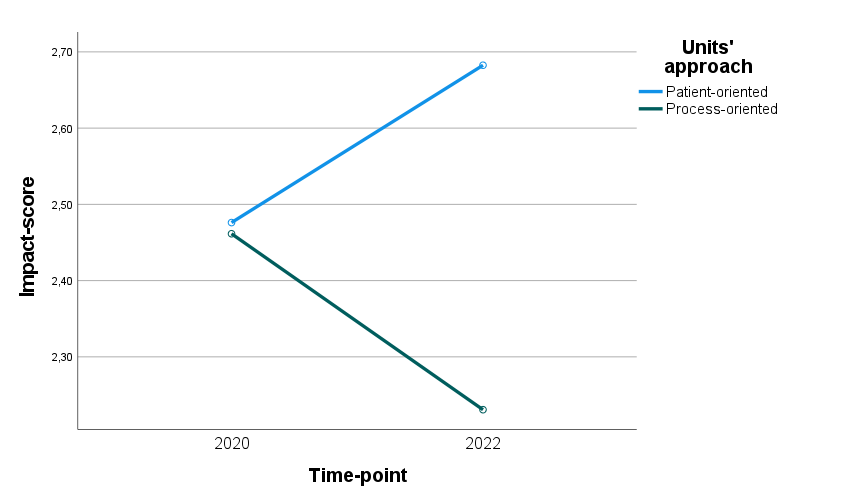


**Figure S1.** Mixed between-within subjects ANOVA (Impact x Time).
